# Supplementary material for: Resistant Potato Starch Alters the Cecal Microbiome and Gene Expression in Mice Fed a Western Diet Based on NHANES Data
Source: Front Nutr. 2022 Mar 22;9:782667. doi: 10.3389/fnut.2022.782667 (PMC8983116; doi:10.3389/fnut.2022.782667)
Supplement: Supplementary file 6 [file Table_6.xlsx]

## Sheet: Metabolism Genes Up.tab
Table 6S	Cecum	2% vs 0%			5% vs 0%			10% vs 0%
Gene	Functional Categorization (PubMed IDs are indicated in parenthesis)	FC	p (adj)		FC	p (adj)		FC	p (adj)
	Amino Acid Metabolism or Transport
Inmt	Selenoamino Acid Metabolism (26537946)							-4.82839	0.0191558
Etnppl	Lysine Catabolism (22241472)							-1.85888	6.55e-12
Got1	Biosynthesis of Glutamate; Biosynthesis of Oxaloacetate							-1.50044	0.000213841
Odc1	Ornithine Metabolism (2317811); Polyamine Metabolism (2317811)							-1.48524	0.0369445
Hoga1	Hydroxyproline Metabolism (31696211)							1.45664	2.98e-05
Gchfr	Phenylalanine Catabolism (11818540); Tetrahydrobiopterin Synthesis (11818540)							1.45853	0.0196192
Slc38a1	Amino Acid Transporter							1.46551	0.00723364
Ckb	Arginine Metabolism							1.52806	0.0151104
Tph1	Tryptophan Metaboilism							1.55471	0.0469192
Slc6a14	Beta alanine Transporter (18599538)							1.56976	9.8e-05
Castor2	Intracellular Arginine Sensor (26972053); Positive Regulator of mTORC1 Signalling							1.61213	0.00914183
Sat2	Thialysine Metabiolism (15283699)							1.63795	3.71e-05
Slc6a17	Alanine Transporter (18768736); Glycine Transporter (18768736); Leucine Transporter (19147495); Proline Transporter (19147495)							1.76518	0.00122967
Nags	Arginine Metabolism (20931344); N-acetylglutamate Biosynthesis	1.78785	0.0273941		2.39405	3.74e-08		2.70326	0.0245302
	Carbohydrate Metabolism or Transport
Slc2a1	Glucose Transporter				-1.73863	9.65e-08		-1.95239	0.021119
Pfkfb4	Glycolysis; Biosynthesis of Fructose-2,6-bisphosphate				-1.32925	0.0582863		-1.85757	0.0155518
Ppcs	Acetyl-CoA Biosynthesis; Phosphopantothenoylcysteine Biosynthesis				-1.49117	0.000865954		-1.7664	5.03e-09
Me1	Glycolysis				-1.55211	0.0608223		-1.73272	0.000346407
Gapdh	Glycolysis; Biosynthesis of 1, 3 Bisphosphoglycerate							-1.58	1.66e-08
Slc45a3	Glucose Transporter (22521588)				-1.48861	0.00208046		-1.53108	0.00296333
Pfkfb2	Glycolysis; Biosynthesis of Fructose-2,6-bisphosphate							1.52532	9.05e-06
Pgm5	Glycolysis; Biosynthesis of Glucose-1-phosphate (8586438); Biosynthesis of Glucose-6-phosphate (8586438)				1.38742	0.0517193		1.5869	1.6e-12
Slc13a2	Citrate Transporter (20610529); Succinate Transporter (20610529)				1.47342	0.0537569		1.93127	0.000186612
	Lipid Metabolism or Transport
Apoa4	Positive Regulator of Lecithin-cholesterol Acyltransferase Activity	-3.74038	0.000574875		-14.5668	1.93e-15		-20.6962	3.61e-17
Creb3l3	Lipid Metabolism (21666694)				-2.81813	1.02e-08		-4.96595	5.33e-23
Apoa1	Lipid Metabolism							-4.11027	0.00273048
Acot12	Lipid Metabolism (23709691)				-3.9946	7.52e-06		-3.46028	1.83e-05
Hilpda	Lipid Metabolism (24876382)				-2.30793	0.000300796		-3.29589	2.02e-09
Dgat2	Triglyceride Biosynthesis (11481335)				-1.69663	0.000165886		-2.25034	6.55e-12
Agpat2	Triglyceride Biosynthesis				-1.68493	0.0181851		-2.23986	3.99e-06
Cidec	Lipid Metabolism (24627478)				-1.75751	0.023271		-2.20969	6.02e-05
Acox2	Lipid Metabolism (2079609)							-1.94279	0.00287878
Ifrd1	Lipid Metabolism (16085642)							-1.91441	0.00299106
Acaa1b	Lipid Metabolism (21352884)	-1.8987	0.00827669		-2.12093	1.53e-05		-1.82753	0.00034088
Ppcs	Acetyl-CoA Biosynthesis; Phosphopantothenoylcysteine Biosynthesis				-1.49117	0.000865954		-1.7664	1.66e-08
Me1	Fatty Acid Biosynthesis				-1.55211	0.0608223		-1.73272	0.00296333
Pdp1	Acetyl-CoA Biosynthesis							-1.61515	0.00012078
Plin2	Lipid Metabolism (14707038)				-1.48072	0.000740782		-1.59435	3.99e-06
Vldlr	Lipid Transport				-1.36936	0.0441615		-1.57854	0.000145198
Insig1	Cholesterol Metabolism (12242342)							-1.57372	0.0105992
Acot2	Lipid Metabolism (10944470)							-1.48971	0.00820356
Fads3	Fatty Acid Desaturase							1.4837	0.00311866
Hacd4	Lipid Metabolism; Very Long-chain Fatty Acid Oxidation (18554506)				1.5288	0.011088		1.54627	0.0026682
Gm29560	ApoL Superfamily; Rodent-specific gene							1.55047	0.0368237
Sec14l2	Lipid Metabolism; Cholesterol Metabolism (11226224)							1.55893	0.0178439
Apobec2	Lipid Metabolism				1.58713	0.0975804		1.70937	0.0140792
Plpp1	Lipid Metabolism (28273928)				1.4445	0.000865954		1.76031	5.18e-10
Apol7a	Lipid Metabolism; ApoL Superfamily; Mouse-specific gene							2.31403	0.0011505
Apol9a	Lipid Metabolism; ApoL Superfamily; Rodent-specific gene							2.45665	0.0327121
Ildr2	Lipid Metabolism (23826244)							2.69648	0.0306569
Lrp2	Lipoprotein Metabolism (7642623)							3.03017	0.00171279
Apol11a	Lipid Metabolism; ApoL Superfamily; Rodent-specific gene							3.29007	0.0310345
	Mineral Metabolism or Transport
Stc1	Negative Regulator of Intestinal Calcium Transport (9458778); Positive Regulator of Intestinal Phosphate Transport (9458778)				-4.03844	2.2e-07		-4.90262	0.00182065
Inmt	Selenoamino Acid Metabolism (26537946)							-4.82839	0.0461976
Slc40a1	Iron Metabolism (12836025)							-1.75119	2.25e-10
Hmox1	Iron Metabolism (19162549)				-1.65915	0.0375356		-1.5355	2.29e-05
Selenom	Selenoprotein				1.44266	0.00849238		1.62499	0.00869773
Slc39a13	Transporter; Zinc Transporter							1.69868	9.8e-05
	Prostaglandin/Leukotriene Metabolism
Ptgs2	Conversion of Arachidonic Acid to Prostaglandin H2							-2.65915	1.72e-05
Cyp2c23	Biosynthesis of Epoxyeicosatrienoic Acid (28352940)				-1.99451	0.00678204		-1.78388	0.0124133
Cyp4f14	Leukotriene B4 Omega Hydroxylase (11185557)							-1.53624	0.00440589
Cyp2c55	Biosynthesis of Hydroxyeicosatetraenoic Acid (15102943); Biosynthesis of Hydroxyoctadecadienoic Acid (15102943)				-1.38717	0.00561291		-1.49858	4.55e-05
Cyp4f15	Prostaglandin H 19-hydroxylase (16112640)				3.02518	2.76e-06		6.32193	4.58e-20
	Vitamin Metabolism or Transport
Cyp24a1	Vitamin D Catabolism							-25.8099	0.00440589
Rbp7	Vitamin A Metabolism (12177003)				-2.18912	0.0455059		-2.82049	0.0178439
Rbp2	Vitamin A Metabolism; Intracellular Retinol Transport (28132904)	-1.55779	0.0793123		-2.35665	1.66e-11		-2.71291	4.55e-05
Dhrs9	Vitamin A Metabolism (11304534)				-2.09904	0.00278568		-2.38343	0.000898041
Vnn1	V & M; Pantothenic Acid Metabolism				-1.77895	0.00419205		-1.65006	0.00152706
Rbp1	Vitamin A Metabolism; Intracellular Retinol Transport (28132904)				-1.64079	0.00573948		-1.64706	9.81e-17
Cyp4f14	Vitamin E Metabolism (22665481)							-1.53624	9.61e-07
Pnpo	Vitamin B6 Metabolism				1.3507	0.00401433		1.52419	3.98e-05
Sec14l2	Vitamin E Transporter (10829015)							1.55893	0.00651305
	Miscellaneous Transport
Mfsd2a	Lysophosphatidylcholine Transporter				-6.79692	0.00109398		-7.07948	1.48e-06
Abcb11	Bile Acid Transporter (9806540)				-6.9997	0.0172722		-7.07238	1.79e-06
Slc4a11	Bicarbonate Transporter (15525507)				-4.50044	7.84e-06		-4.45281	1.73e-05
Slc9a3	Chloride Ion Transport (16715296)				-1.63649	0.0327136		-2.66094	4.47e-05
Slc51b	Bile Acid Transporter							-1.89693	0.00196191
Trpa1	Calcium Channel							-1.89286	0.00200213
Best2	Chloride Channel							-1.8726	0.00634882
Slc16a3	Lactate Transporter (12739169); Monocarboxylate Transporter (12739169); Pyruvate Transporter (12739169)							-1.772	0.0337031
Slc1a4	Glutamate Transporter							-1.67318	0.000436715
Aqp8	Water Transporter (22192778)				-1.46982	0.0809906		-1.60252	0.00087426
Slc41a2	Magnesium Transporter				-1.41424	0.0430307		-1.54036	0.0413032
Slc51a	Bile Acid Transporter (18292224)							-1.52463	6.29e-09
Atp2c2	Calcium Transporter				-1.48155	0.00540873		-1.5072	9.05e-06
Sprr2a3	Bile Acid Transporter (18292224)							-1.46554	1.6e-12
Clic5	Intracellular Chloride Channel							1.4611	0.000186612
Fxyd6	Sodium Ion Transport							1.56021	0.0284166
Kcnd3	Potassium Channel				1.41518	0.0998414		1.58807	0.000625825
Car4	Bicarbonate Transport (15563508)							1.59481	0.00112207
Slc25a45	Orphan Transporter							1.60312
Atp2b4	Calcium Transporter				1.37553	0.082786		1.61613	0.0120768
Slc26a3	Chloride Ion Transport (16715296)				1.48409	0.00492605		1.63404	4.82e-10
Trpv2	Intracellular Chloride Channel (26416880)							1.63742	0.00771052
Slc46a3	Orphan Transporter				1.52464	0.0660708		1.65489	0.000205594
Slc13a2	Citrate Transporter (20610529); Succinate Transporter (20610529)				1.47342	0.0537569		1.93127	0.0015491
Kcnk13	Potassium Channel							2.03618	0.0243184
Slc1a2	Glutamate Transporter (7521911)				1.91846	0.0133769		2.12938	0.00566115
Slc10a2	Bile Acid Transporter (16749855)				2.10222	0.0003727		2.16024	0.00384363
Kcnf1	Potassium voltage-gated channel modifier	1.48804	0.057504		1.57767	0.000300796		2.22429	7.72e-05
Kcng4	Potassium Channel							2.31225	0.00119363
Slc5a8	Iodide Transporter				1.79017	0.000865954		2.45422	0.0328287
Slc12a6	Potassium Transporter				1.8641	0.0167206		2.45826	1.07e-05
Kcnj6	Potassium Channel							2.52054	1.02e-14
Slc34a2	Sodium Transporter				2.83354	0.0242066		2.71526	0.00133303
Lypd8l	Bile Acid Transporter (18292224)				2.46119	0.0600772		4.29488	0.0128254
Clic6	Intracellular Chloride Channel				1.45115	0.0435456
Aqp3	Water Transporter (16079275); Urea Transporter (19096786)				-3.99285	0.00401433
	Miscellaneous Enzyme
Prss22	Enzyme; Protease				-11.0941	0.000300796		-6.37528	0.00229382
Mmp10	Enzyme: Metalloprotease				-4.73633	0.0592225		-6.21571	0.0067847
B3galt5	Enzyme; Galactosyltransferase				-4.563	7.84e-06		-5.90453	5.82e-09
Tgm5	Enzyme; Class II Transglutaminase Family				-2.22144	0.0939838		-4.63939	3.03e-05
Sec1	Enzyme; Fucosyltransferase				-3.70997	0.0133769		-3.80474	0.00389344
Plau	Enzyme: Metalloprotease				-1.53769	0.0582863		-2.41427	4.74e-08
Pde9a	Enzyme; Phosphodiesterase							-2.17402	5.9e-08
Tgm7	Enzyme; Class II Transglutaminase Family (22015769)							-1.94095	0.0419763
Adam18	Enzyme: Metalloprotease							-1.85316	0.0437764
Lpcat4	Enzyme; Conversion of Lysophosphatidic Acid to Phosphatidic Acid							-1.83799	0.00192893
Upp1	Enzyme; Salvage of Pyrimidine Ribonucleosides				-1.55937	0.00130458		-1.79976	5.83e-07
Mt1	Enzyme: Metallothionein				-1.81834	0.00721054		-1.72527	0.00646384
Ckmt1	Enzyme; Creatine Phosphate Biosynthesis				-1.53159	2.2e-07		-1.68683	3.63e-12
Hsd11b2	Enzyme; Bioconversion of Cortisol to Cortisone				-1.44459	0.0343808		-1.68064	0.000131787
Mt3	Enzyme: Metallothionein							-1.65955	0.00647314
Spink4	Enzyme; Serine Protease Inhibitor				-1.37285	0.00361627		-1.61691	5.51e-08
Map2k3	Enzyme; Kinase; FCER Signaling				-1.39506	0.014168		-1.58951	2.69e-05
Cyp2j6	Enzyme; Cytochrome P450 Superfamily; Mouse specific gene				-1.35472	0.00100909		-1.50354	1.91e-07
Pim3	Enzyme; Kinase							-1.49698	0.00246307
Pla2g15	Enzyme; Endogenous Lipid Antigen Processing (234935500);							1.45279	0.0324846
Tgm2	Enzyme; Class II Transglutaminase Family (22015769)							1.50952	0.00698845
Adamtsl4	Enzyme: Metalloprotease							1.50982	0.00550821
Mgam2-ps	Enzyme; Degradation of Starch							1.51973	4.36e-06
Cyp2d34	Enzyme; Cytochrome P450 Superfamily; Mouse specific gene							1.56024	0.0203573
Xylt1	Enzyme; Xylosyltransferase; Proteoglycan Synthesis (32920014)							1.6011	0.00145123
Adamts18	Enzyme: Metalloprotease				1.53412	0.0662981		1.60653	0.0120946
Cmpk2	Enzyme; Salvage Nucleotide Synthesis				1.38153	0.0712386		1.63337	0.000232788
Mmp23	Enzyme: Metalloprotease (10945999)							1.63596	0.00381423
Fmo4	Enzyme; Amino-trimethylamine Oxidation							1.64439	0.0156172
Adamts8	Enzyme: Metalloprotease							1.70845	0.0120491
Mep1b	Enzyme: Metalloprotease				1.44044	0.0975804		1.77787	0.000339603
Pla2g2c	Enzyme; Secretory phospholipase A2							1.81637	7.44e-06
B4galt2	Enzyme; Galactosyltransferase							1.81708	0.0120491
Helz2	Enzyme; Helicase				1.27553	0.082786		1.81948	2.18e-10
Urad	Enzyme; Uric Acid Degradation				1.90066	0.0999266		1.90447	0.044037
Pld5	Enzyme; Phospholipase				1.96979	0.0387612		2.01012	0.011149
Cyp2d10	Enzyme; Cytochrome P450 Superfamily; Mouse specific gene							2.04914	0.00850192
Ggt1	Enzyme; Glutathione Metabolism				1.79238	0.0660708		2.09911	0.00276842
Chst15	Enzyme; Sulfotransferase				1.94697	0.0717512		2.12482	0.0105389
Cyp2d12	Enzyme; Cytochrome P450 Superfamily; Mouse specific gene				1.86638	0.0691866		2.52877	0.000298797
Ppp1r12b	Enzyme; Myosin phosphatase				1.86523	0.00361627		2.74883	3.22e-09
Mapk15	Enzyme; Kinase							2.85849	0.000641254
Cyp2d9	Enzyme; Cytochrome P450 Superfamily; Mouse specific gene							3.1365	4.47e-05
Plb1	Enzyme; Phospholipase							3.3153	0.000629812
Gm5431	Enzyme; Immunity-related GTPase Family; Rodent-specific gene.							3.42648	0.000213841
Plaat1	Enzyme; Acyltransferase (26503625)				2.59594	0.0450352		4.3206	3.22e-05
